# Supplementary material
Source: PubMed Central journal article supplement (PMC3557725)
Supplement: NIHMS423924-supplement-Supp_FigureS1.pdf [file NIHMS423924-supplement-Supp_FigureS1.pdf]

## SUPPLEMENTARY MATERIALS

### Crystal Structure of Decaprenylphosphoryl- $\beta$ -D-Ribose 2'-Epimerase from *Mycobacterium smegmatis*

Hua Li<sup>1,2</sup> and Gerwald Jogl<sup>1,3</sup>

1. Department of Molecular Biology, Cellular Biology and Biochemistry, Brown University, Providence, Rhode Island 02912, USA.
2. Present address: Howard Hughes Medical Institute, University of Texas Southwestern Medical Center, Dallas, TX 75390, USA.
3. Correspondence should be addressed to: Gerwald Jogl, Department of Molecular Biology, Cell Biology and Biochemistry, Box G-E128, Brown University, Providence, RI 02912, USA. Tel. (401) 863 6123; Fax: (401) 863 6114 E-mail: Gerwald\_Jogl@brown.edu.

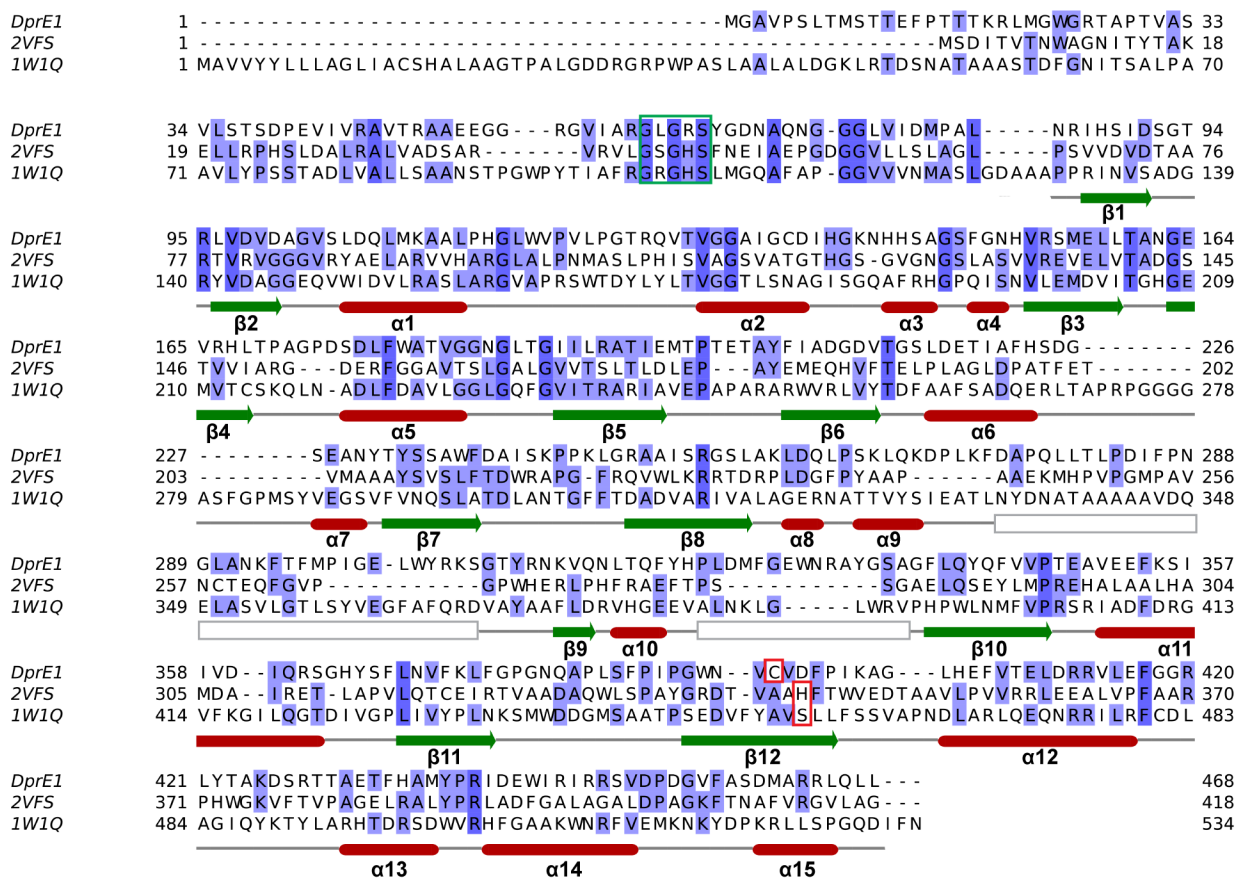

**Figure S1: Sequence alignment of DprE1 with structurally related flavoenzymes.**

Alignment of DprE1 from *M. smegmatis* with alditol oxidase (PDB entry 2VFS) and with cytokinin dehydrogenase (PDB entry 1W1Q). The location of secondary structure elements in the DprE1 structure is shown beneath the alignment with disordered regions indicated with grey boxes. FAD-binding histidine residues in 2VFS and 1W1Q are shown in green boxes. The position of DprE1 Cys394 and equivalent residues in the two other structures is indicated with red boxes.
